# Supplementary material for: Effective Properties of Semitransparent Radiative Cooling Materials With Spectrally Variable Properties
Source: Research Square preprint supplement (doi:10.21203/rs.3.rs-777647/v1), 2021-08-05
Supplement: Supplementary file 1 [file 2c4d3b64b1e06648b60b48ee.docx]

**Supplementary Information**

**Effective Properties of Semi-transparent Radiative Cooling Materials With Spectrally Variable Properties**

Ravi Anant Kishore+,*, Chuck Booten+,*, and Sajith Wijesuriya

National Renewable Energy Laboratory, 15013 Denver West Parkway, Golden, CO 80401.

+ These authors contributed equally to the work.

* Corresponding authors: [ravi.kishore@nrel.gov](mailto:ravi.kishore@nrel.gov) (RAK) and [Chuck.Booten@nrel.gov](mailto:Chuck.Booten@nrel.gov) (CB)

**MATLAB Code for Iterative Solver**

fun=@EffectiveProperties;

x0=[0 0 0 0];

lb=[0 0 0 0];

ub=[1 1 1 1];

A=[];

b=[];

Aeq=[];

beq=[];

[x,fval] = fmincon(fun,x0,A,b,Aeq,beq,lb,ub);

function Error = EffectiveProperties(x)

Eff_e1_os=x(1); %Outer surface effective emissivity in solar region

Eff_t1_os=x(2); %Outer surface effective transmissivity in solar region

Eff_e2_os=x(3); %Outer surface effective emissivity in thermal region

Eff_t2_os=x(4); %Outer surface effective transmissivity in thermal region

Eff_r1_os=1-(Eff_e1_os+Eff_t1_os);

%Outer surface effective reflectivity in solar region

Eff_r2_os=1-(Eff_e2_os+Eff_t2_os);

%Outer surface effective reflectivity in thermal region

%% Constant Parameters

T_solar=5778; %Sun temperature (K)

T_surface=300; %Surface temperature (K)

T_sky=250; %Sky temperature (K)

C1=3.74E+08; %Constant (W*um^4/m^2)

C2=1.44E+04; %Constant (um*K)

stephan_boltzman=5.67E-08; %Constant (W*K/m^2)

%% Input variables

lambda1=xlsread('Input','B3:B30');%Imported wavelength (um)

e1_os=xlsread('Input','C3:C30'); %Imported emissivity of outer surface

t1_os=xlsread('Input','E3:E30');

%Imported transmissivity of outer surface

r1_os=xlsread('Input','G3:G30');

%Imported reflectivity of outer surface

e_is=0.91; %Emissivity of inner surface

r_is=1-0.91; %Reflectivity of inner surface

%% Interpolation variables

dl=0.1; %Wavelength resolution (um)

lambda_max=100; %Maximum wavelength in this study (um)

lambda=dl:dl:lambda_max; %Wavelength distribution (um)

e_os=interp1(lambda1,e1_os,lambda)';

%Spectral variable emissivity of outer surface

t_os=interp1(lambda1,t1_os,lambda)';

%Spectral variable transmissivity of outer surface

r_os=interp1(lambda1,r1_os,lambda)';

%Spectral variable reflectivity of outer surface

%% Blackbody Sun

Total_solar=961; %Total solar power used for scaling W/m^2

I_solar=C1./(lambda.^5.*(exp(C2./lambda./T_solar)-1))';

%Radiation intensity of the blackbody Sun (W/m^2/um)

P_solar=I_solar*dl; %Solar irradiance (W/m^2)

Q_solar=P_solar*Total_solar/sum(P_solar);

%Scaled solar irradiance (W/m^2)

%% Ambient/sky

lambda_a=xlsread('Input','Atm','B2:B288');

%Imported sky wavelength (um)

e_atm1=xlsread('Input','Atm','D2:D288');

%Imported sky emissivity

e_atm=interp1(lambda_a,e_atm1,lambda)';

%Spectral variable sky emissivity

I_sky=C1./(lambda.^5.*(exp(C2./lambda./T_sky)-1))';

%Blackbody Radiation intensity from sky (W/m^2/um)

%% Radiative Surface

I_surface=C1./(lambda.^5.*(exp(C2./lambda./T_surface)-1))';

%Blackbody radiation intensity from surface W/m^2/um)

Q_rad=(I_surface-e_atm.*I_sky)*dl;

%Blackbody radiation exchange between surface and sky (W/m2)

%% Adding indirect radiations

count=lambda_max/dl; %Counting variable

Transmit=zeros(1,count)'; %Transmittance

Qnet1_os=zeros(1,count)';

%Net heat transfer on outer surface in solar region (<2.5 um)

Qnet2_os=zeros(1,count)';

%Net heat transfer on outer surface in thermal region (>2.5 um)

Qnet1_is=zeros(1,count)';

%Net heat transfer on inner surface in solar region (<2.5 um)

Qnet2_is=zeros(1,count)';

%Net heat transfer on inner surface in thermal region (>2.5 um)

%%Net radiation in solar and thermal regions using spectral properties

i=0;

for i=1:1:count

Transmit(i)=t_os(i)/(1-r_os(i)*r_is);

if i<=2.5/dl

Qnet1_os(i)=e_os(i)*(1+Transmit(i)*r_is)*(Q_solar(i)-Q_rad(i));

Qnet1_is(i)=e_is*Transmit(i)*(Q_solar(i)-Q_rad(i));

else

Qnet2_os(i)=e_os(i)*(1+Transmit(i)*r_is)*(Q_solar(i)-Q_rad(i));

Qnet2_is(i)=e_is*Transmit(i)*(Q_solar(i)-Q_rad(i));

end

i=i+1;

end

%%Net radiation in solar and thermal regions using effective properties

Eff_Qnet1_os=zeros(1,count)';

Eff_Qnet2_os=zeros(1,count)';

Eff_Qnet1_is=zeros(1,count)';

Eff_Qnet2_is=zeros(1,count)';

i=0;

for i=1:1:count

if i<=2.5/dl

Eff_transmit1=Eff_t1_os/(1-Eff_r1_os*r_is);

Eff_Qnet1_os(i)=Eff_e1_os*(1+Eff_transmit1*r_is)*(Q_solar(i)-Q_rad(i));

Eff_Qnet1_is(i)=e_is*Eff_transmit1*(Q_solar(i)-Q_rad(i));

else

Eff_transmit2=Eff_t2_os/(1-Eff_r2_os*r_is);

Eff_Qnet2_os(i)=Eff_e2_os*(1+Eff_transmit2*r_is)*(Q_solar(i)-Q_rad(i));

Eff_Qnet2_is(i)=e_is*Eff_transmit2*(Q_solar(i)-Q_rad(i));

end

i=i+1;

end

SumQnet1_os=sum(Qnet1_os);

SumQnet2_os=sum(Qnet2_os);

SumQnet1_is=sum(Qnet1_is);

SumQnet2_is=sum(Qnet2_is);

SumEffQnet1_os=sum(Eff_Qnet1_os);

SumEffQnet2_os=sum(Eff_Qnet2_os);

SumEffQnet1_is=sum(Eff_Qnet1_is);

SumEffQnet2_is=sum(Eff_Qnet2_is);

%%Difference (Error) between the two methods

Error=abs(SumQnet1_os-SumEffQnet1_os)+abs(SumQnet2_os-SumEffQnet2_os)+abs(SumQnet1_is-SumEffQnet1_is)+abs(SumQnet2_is-SumEffQnet2_is);

end
